# Supplementary material for: Exogenous Application of Zinc to Mitigate the Salt Stress in Vigna radiata (L.) Wilczek—Evaluation of Physiological and Biochemical Processes
Source: MDPI journal article supplement (doi:10.3390/plants10051005), 2021-05-18
Supplement: s1 [file s1]

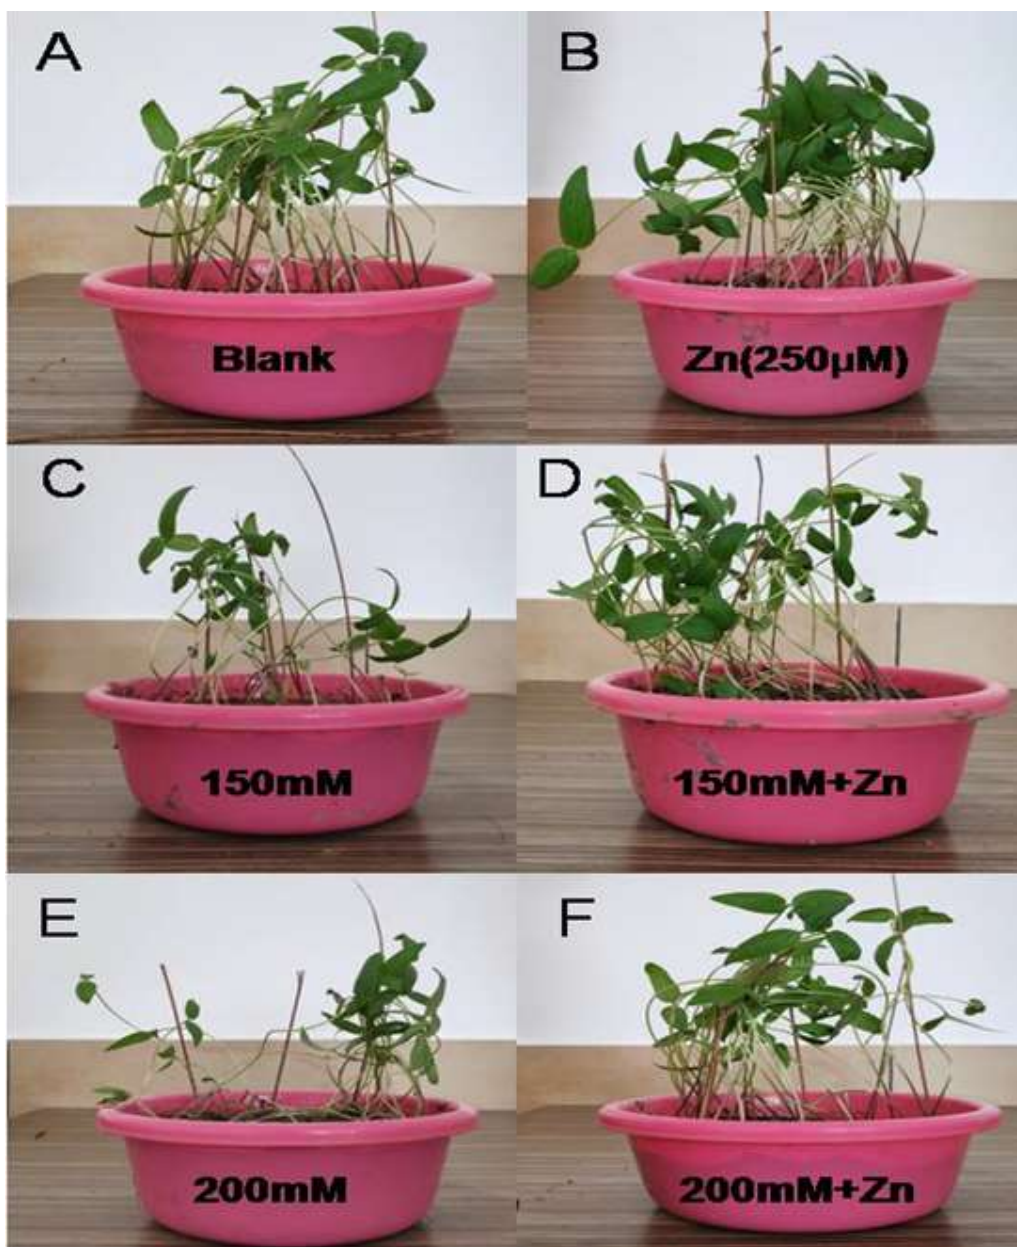

**Figure S1.** Effects of NaCl and Interactive effect of NaCl and Zn on Mungbean.

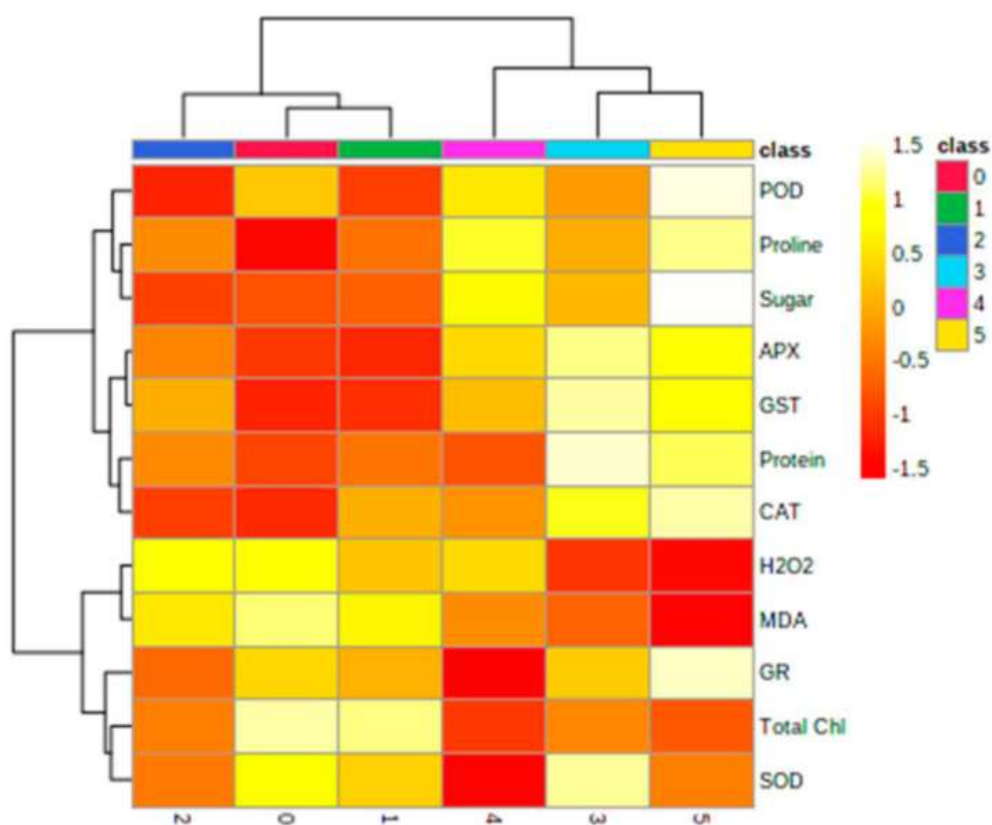

**Figure S2.** Effects of NaCl and Interactive effect of NaCl and Zn on Heatmap based on the activities of total chlorophyll (total Chl), hydrogen peroxide (H<sub>2</sub>O<sub>2</sub>), lipid peroxidation (MDA), proline, protein, sugar, superoxide dismutase (SOD), catalase (CAT), ascorbate peroxidase (APX), peroxidase (POD), glutathione reductase (GR), and glutathione-s-transferase (GST) in mung bean. Heat map scale bars are shown (+1.5) to (-1.5) and the classes 0–5 represent the treatments in the study. Blank (0); Zn (1); 150 mM NaCl (2); 150 mM NaCl + Zn (3); 200 nM NaCl (4); 200 mM NaCl + Zn (5). The white color (1.5) indicates strong up-regulation of the metabolites, the red color (-1.5) indicates strong down-regulation of metabolites and the yellow colors (1) indicate moderate up-regulation of metabolites.
